# Supplementary material
Source: HighWire-hosted journal article supplement (https://erj.ersjournals.com/content/56/6/2003498)
Supplement: inline-supplementary-material-1 [file inline-supplementary-material-1.pdf]

**Systematic evaluation and external validation of 22 prognostic models among hospitalised  
adults with COVID-19: An observational cohort study**

**Supplementary Material**

**Supplementary Table 1: Characteristics of candidate prognostic models for COVID-19 not included in current external validation study.**

All candidate models included in a living systematic review were considered at high risk of bias[1]. ARDS = acute respiratory distress syndrome; ICU = intensive care unit; CT = computed tomography.

| Authors                | Pre-existing or COVID-specific?         | Model outcome                                  | Reason for exclusion                                                                   |
|------------------------|-----------------------------------------|------------------------------------------------|----------------------------------------------------------------------------------------|
| Bai et al[2]           | COVID-specific                          | Deterioration                                  | CT imaging required                                                                    |
| Barda et al[3]         | COVID-specific                          | Mortality                                      | Multiple predictors not available in validation data                                   |
| Chassagnon et al[4]    | COVID-specific                          | Death or invasive mechanical ventilation       | CT imaging required                                                                    |
| Das et al[5]           | COVID-specific                          | Mortality                                      | Province required - not generalisable, and not reproducible                            |
| Gong et al[6]          | COVID-specific                          | Risk of severe disease                         | Model parameters not publicly available                                                |
| Jiang et al[7]         | COVID-specific                          | Development of ARDS by Berlin criteria         | Model parameters not publicly available                                                |
| Levy et al[8]          | COVID-specific                          | Mortality                                      | Emergency severity index not available in validation data                              |
| Liang et al[9]         | COVID-specific                          | Deterioration                                  | Symptom data not available in validation data                                          |
| Liu et al[10]          | COVID-specific                          | Severity                                       | T lymphocyte subsets not available in validation data                                  |
| McRae et al[11]        | COVID-specific                          | Mortality                                      | Pro-calcitonin and myoglobin not available; exact model coefficients also not provided |
| Pourhomayoun et al[12] | COVID-specific                          | Mortality                                      | Model parameters not publicly available                                                |
| Qi et al[13]           | COVID-specific                          | Length of hospital stay                        | CT imaging required                                                                    |
| Sarkar et al[14]       | COVID-specific                          | Mortality                                      | Not generalisable outside Wuhan and model not reproducible                             |
| Singh et al[15]        | Pre-existing (EPIC deterioration index) | ICU admission, mechanical ventilation or death | Model parameters not publicly available                                                |
| Vaid et al[16]         | COVID-specific                          | Mortality and 'critical events'                | Model parameters not publicly available                                                |
| Vazquez et al[17]      | COVID-specific                          | Mortality (in-hospital)                        | Intended for ICU admissions only                                                       |
| Yuan et al[18]         | COVID-specific                          | Mortality                                      | CT imaging required                                                                    |
| Zeng et al[19]         | COVID-specific                          | Progression to severe disease                  | CT imaging required and no reproducible model                                          |

**Supplementary Tables 2a-c: Validation metrics of prognostic scores for COVID-19, using (a) complete case sensitivity analysis (n=411); (b) excluding patients without PCR-confirmed SARS-CoV-2 infection; and (c) excluding patients who met the clinical deterioration outcome within 4 hours of arrival to hospital..**

For each model, performance is evaluated for an approximation of its original intended outcome, shown in 'Primary outcome' column. AUROC = area under the receiver operating characteristic curve; CI = confidence interval.

**(a) Complete case analysis**

| Score            | Primary outcome             | n   | AUROC (95% CI)     | Calibration slope (95% CI) | Calibration in the large (95% CI) |
|------------------|-----------------------------|-----|--------------------|----------------------------|-----------------------------------|
| NEWS2            | Deterioration (1 day)       | 404 | 0.78 (0.73 - 0.83) |                            |                                   |
| Ji               | Deterioration (10 days)     | 183 | 0.61 (0.53 - 0.69) |                            |                                   |
| Carr_final       | Deterioration (14 days)     | 381 | 0.75 (0.71 - 0.8)  | 0.93 (0.7 - 1.18)          | 0.46 (0.23 - 0.69)                |
| Carr_threshold   | Deterioration (14 days)     | 381 | 0.74 (0.69 - 0.79) | 0.78 (0.59 - 0.99)         | -0.29 (-0.52 - -0.05)             |
| Guo              | Deterioration (14 days)     | 153 | 0.7 (0.62 - 0.78)  |                            |                                   |
| Zhang_poor       | Deterioration (in-hospital) | 400 | 0.74 (0.69 - 0.78) | 0.31 (0.21 - 0.42)         | 0.59 (0.32 - 0.83)                |
| Colombi_clinical | Deterioration (in-hospital) | 182 | 0.72 (0.64 - 0.79) | 0.64 (0.38 - 0.93)         | 0 (-0.34 - 0.33)                  |
| Galloway         | Deterioration (in-hospital) | 351 | 0.7 (0.65 - 0.75)  |                            |                                   |
| Huang            | Deterioration (in-hospital) | 182 | 0.7 (0.63 - 0.78)  | 0.27 (0.16 - 0.38)         | -5.09 (-5.54 - -4.65)             |
| TACTIC           | Deterioration (in-hospital) | 366 | 0.68 (0.63 - 0.73) |                            |                                   |
| Shi              | Deterioration (in-hospital) | 411 | 0.61 (0.56 - 0.66) |                            |                                   |
| MEWS             | Deterioration (in-hospital) | 405 | 0.59 (0.54 - 0.65) |                            |                                   |
| Lu               | Mortality (12 days)         | 403 | 0.71 (0.67 - 0.76) |                            |                                   |
| CURB65           | Mortality (30 days)         | 374 | 0.75 (0.7 - 0.8)   |                            |                                   |
| BelloChavolla    | Mortality (30 days)         | 385 | 0.66 (0.6 - 0.72)  |                            |                                   |
| Xie              | Mortality (in-hospital)     | 183 | 0.78 (0.7 - 0.86)  | 0.91 (0.55 - 1.31)         | 0.03 (-0.37 - 0.41)               |
| REMS             | Mortality (in-hospital)     | 404 | 0.76 (0.71 - 0.81) |                            |                                   |
| Hu               | Mortality (in-hospital)     | 153 | 0.75 (0.66 - 0.84) | 0.38 (0.21 - 0.58)         | -1.61 (-2.11 - -1.14)             |
| Caramelo         | Mortality (in-hospital)     | 408 | 0.71 (0.66 - 0.77) | 0.53 (0.36 - 0.7)          | 0 (-0.26 - 0.25)                  |
| Zhang_death      | Mortality (in-hospital)     | 400 | 0.7 (0.64 - 0.76)  | 0.28 (0.18 - 0.39)         | 0.92 (0.63 - 1.21)                |
| qSOFA            | Mortality (in-hospital)     | 405 | 0.6 (0.54 - 0.65)  |                            |                                   |
| Yan              | Mortality (in-hospital)     | 182 | 0.6 (0.52 - 0.68)  |                            |                                   |
| Age              | Mortality (in-hospital)     | 411 | 0.76 (0.71 - 0.81) |                            |                                   |
| SpO2 on air      | Deterioration (in-hospital) | 403 | 0.76 (0.71 - 0.81) |                            |                                   |

**(b) Restriction to PCR-confirmed cases (n=370)**

| Score            | Primary outcome             | AUROC (95% CI)     | Calibration slope (95% CI) | Calibration in the large (95% CI) |
|------------------|-----------------------------|--------------------|----------------------------|-----------------------------------|
| NEWS2            | Deterioration (1 day)       | 0.79 (0.74 - 0.84) |                            |                                   |
| Ji               | Deterioration (10 days)     | 0.58 (0.52 - 0.64) |                            |                                   |
| Carr_final       | Deterioration (14 days)     | 0.78 (0.73 - 0.83) | 1.02 (0.77 - 1.27)         | 0.38 (0.14 - 0.61)                |
| Carr_threshold   | Deterioration (14 days)     | 0.76 (0.71 - 0.81) | 0.83 (0.62 - 1.04)         | -0.3 (-0.54 - -0.06)              |
| Guo              | Deterioration (14 days)     | 0.68 (0.62 - 0.74) |                            |                                   |
| Zhang_poor       | Deterioration (in-hospital) | 0.74 (0.69 - 0.79) | 0.3 (0.19 - 0.41)          | 0.64 (0.38 - 0.91)                |
| Galloway         | Deterioration (in-hospital) | 0.73 (0.68 - 0.78) |                            |                                   |
| TACTIC           | Deterioration (in-hospital) | 0.71 (0.65 - 0.76) |                            |                                   |
| Colombi_clinical | Deterioration (in-hospital) | 0.68 (0.63 - 0.74) | 0.52 (0.33 - 0.71)         | 0.02 (-0.23 - 0.26)               |
| Huang            | Deterioration (in-hospital) | 0.67 (0.61 - 0.73) | 0.18 (0.1 - 0.26)          | -4.2 (-4.58 - -3.81)              |
| Shi              | Deterioration (in-hospital) | 0.61 (0.56 - 0.67) |                            |                                   |
| MEWS             | Deterioration (in-hospital) | 0.6 (0.55 - 0.66)  |                            |                                   |
| Lu               | Mortality (12 days)         | 0.73 (0.69 - 0.78) |                            |                                   |
| CURB65           | Mortality (30 days)         | 0.74 (0.69 - 0.79) |                            |                                   |
| BelloChavolla    | Mortality (30 days)         | 0.66 (0.6 - 0.72)  |                            |                                   |
| REMS             | Mortality (in-hospital)     | 0.76 (0.71 - 0.81) |                            |                                   |
| Xie              | Mortality (in-hospital)     | 0.75 (0.68 - 0.82) | 0.78 (0.46 - 1.1)          | 0.46 (0.2 - 0.71)                 |
| Hu               | Mortality (in-hospital)     | 0.73 (0.67 - 0.79) | 0.33 (0.2 - 0.46)          | -0.99 (-1.3 - -0.67)              |
| Zhang_death      | Mortality (in-hospital)     | 0.71 (0.65 - 0.76) | 0.3 (0.19 - 0.41)          | 0.99 (0.69 - 1.29)                |
| Caramelo         | Mortality (in-hospital)     | 0.7 (0.65 - 0.76)  | 0.5 (0.32 - 0.67)          | 0.02 (-0.24 - 0.28)               |
| qSOFA            | Mortality (in-hospital)     | 0.6 (0.55 - 0.66)  |                            |                                   |
| Yan              | Mortality (in-hospital)     | 0.58 (0.49 - 0.67) |                            |                                   |
| SpO2 on air      | Deterioration (in-hospital) | 0.76 (0.71 - 0.81) |                            |                                   |
| Age              | Mortality (in-hospital)     | 0.75 (0.7 - 0.81)  |                            |                                   |

**(c) Excluding deterioration events <4 hours from admission (n=371)**

| Score            | Primary outcome             | AUROC (95% CI)     | Calibration slope (95% CI) | Calibration in the large (95% CI) |
|------------------|-----------------------------|--------------------|----------------------------|-----------------------------------|
| NEWS2            | Deterioration (1 day)       | 0.74 (0.67 - 0.81) |                            |                                   |
| Ji               | Deterioration (10 days)     | 0.55 (0.49 - 0.62) |                            |                                   |
| Carr_final       | Deterioration (14 days)     | 0.74 (0.69 - 0.79) | 0.87 (0.62 - 1.12)         | 0.14 (-0.1 - 0.37)                |
| Carr_threshold   | Deterioration (14 days)     | 0.73 (0.67 - 0.78) | 0.73 (0.52 - 0.94)         | -0.54 (-0.78 - -0.29)             |
| Guo              | Deterioration (14 days)     | 0.65 (0.58 - 0.71) |                            |                                   |
| Zhang_poor       | Deterioration (in-hospital) | 0.72 (0.67 - 0.78) | 0.39 (0.27 - 0.51)         | 0.3 (0.03 - 0.58)                 |
| Galloway         | Deterioration (in-hospital) | 0.69 (0.64 - 0.75) |                            |                                   |
| Colombi_clinical | Deterioration (in-hospital) | 0.68 (0.62 - 0.74) | 0.48 (0.29 - 0.66)         | -0.25 (-0.5 - -0.01)              |
| TACTIC           | Deterioration (in-hospital) | 0.66 (0.6 - 0.71)  |                            |                                   |
| Huang            | Deterioration (in-hospital) | 0.63 (0.56 - 0.71) | 0.14 (0.06 - 0.23)         | -4.49 (-4.84 - -4.15)             |
| Shi              | Deterioration (in-hospital) | 0.59 (0.54 - 0.65) |                            |                                   |
| MEWS             | Deterioration (in-hospital) | 0.56 (0.5 - 0.62)  |                            |                                   |
| Lu               | Mortality (12 days)         | 0.73 (0.69 - 0.78) |                            |                                   |
| CURB65           | Mortality (30 days)         | 0.74 (0.69 - 0.8)  |                            |                                   |
| BelloChavolla    | Mortality (30 days)         | 0.65 (0.59 - 0.72) |                            |                                   |
| REMS             | Mortality (in-hospital)     | 0.76 (0.71 - 0.81) |                            |                                   |
| Xie              | Mortality (in-hospital)     | 0.75 (0.68 - 0.82) | 0.83 (0.52 - 1.13)         | 0.32 (0.05 - 0.59)                |
| Hu               | Mortality (in-hospital)     | 0.73 (0.67 - 0.79) | 0.34 (0.21 - 0.48)         | -1.07 (-1.38 - -0.75)             |
| Caramelo         | Mortality (in-hospital)     | 0.71 (0.65 - 0.77) | 0.51 (0.33 - 0.69)         | -0.18 (-0.46 - 0.09)              |
| Zhang_death      | Mortality (in-hospital)     | 0.69 (0.63 - 0.75) | 0.29 (0.17 - 0.4)          | 0.88 (0.57 - 1.19)                |
| qSOFA            | Mortality (in-hospital)     | 0.59 (0.53 - 0.66) |                            |                                   |
| Yan              | Mortality (in-hospital)     | 0.57 (0.48 - 0.66) |                            |                                   |
| Age              | Mortality (in-hospital)     | 0.77 (0.71 - 0.82) |                            |                                   |
| SpO2 on air      | Deterioration (in-hospital) | 0.7 (0.64 - 0.76)  |                            |                                   |

**Supplementary Table 3: Optimism estimates for most discriminating univariable predictors of clinical deterioration and mortality**

Optimism is calculated using bootstrapping with 1,000 iterations. AUROC = area under the receiver operating characteristic curve; CI = confidence interval. Dxy = Somers' Delta, which is a measure of agreement between pairs of ordinal variables, ranging from -1 (no agreement) to +1 (complete agreement).

| Predictor                    | Outcome                     | AUROC (95% CI)     | Optimism   |              |
|------------------------------|-----------------------------|--------------------|------------|--------------|
|                              |                             |                    | <i>Dxy</i> | <i>Slope</i> |
| Age                          | Mortality (in-hospital)     | 0.76 (0.71 - 0.81) | 0.000      | -0.009       |
| Oxygen saturation (room air) | Deterioration (in-hospital) | 0.76 (0.71 - 0.81) | -0.001     | -0.011       |

**Supplementary Figure 1: Flowchart showing prognostic models included in systematic evaluation.**

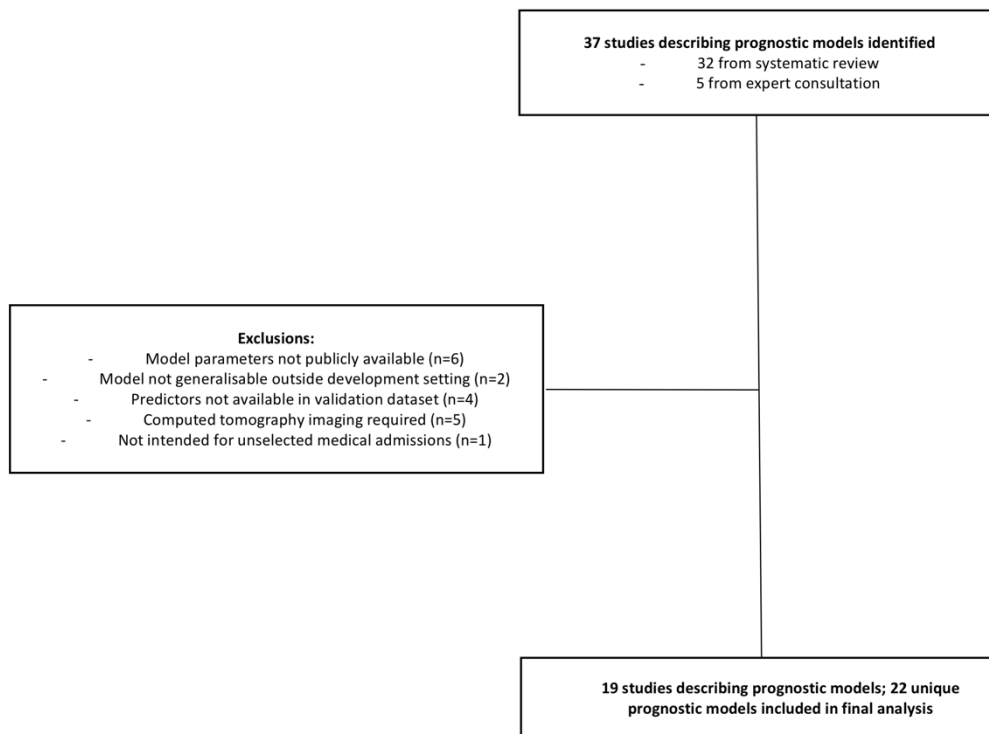

**Supplementary Figure 2: Flowchart showing study participants included in analysis.**

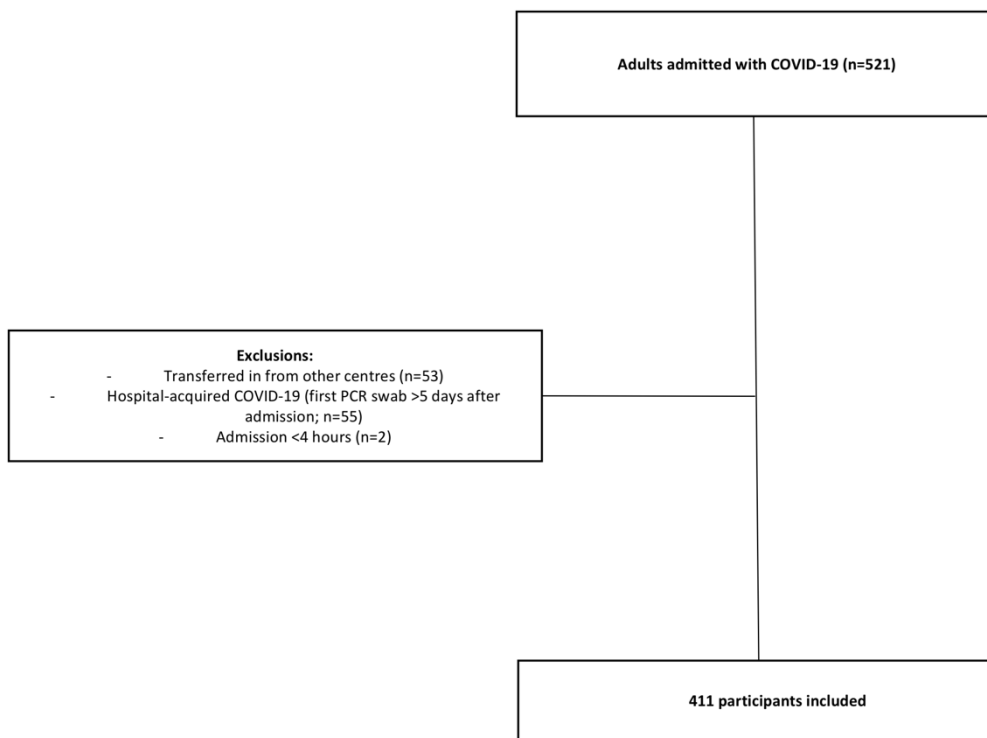



**Supplementary Figure 3: Timing of clinical deterioration and death following hospital admission among patients with COVID-19**

Shown as Kaplan-Meier plots and histograms. Days to deterioration histogram reflects the first time that the endpoint was met, with the criteria for meeting the endpoint indicated by colour. CPAP = continuous positive airway pressure; HFNO = high flow nasal cannula oxygen; IMV = invasive mechanical ventilation.

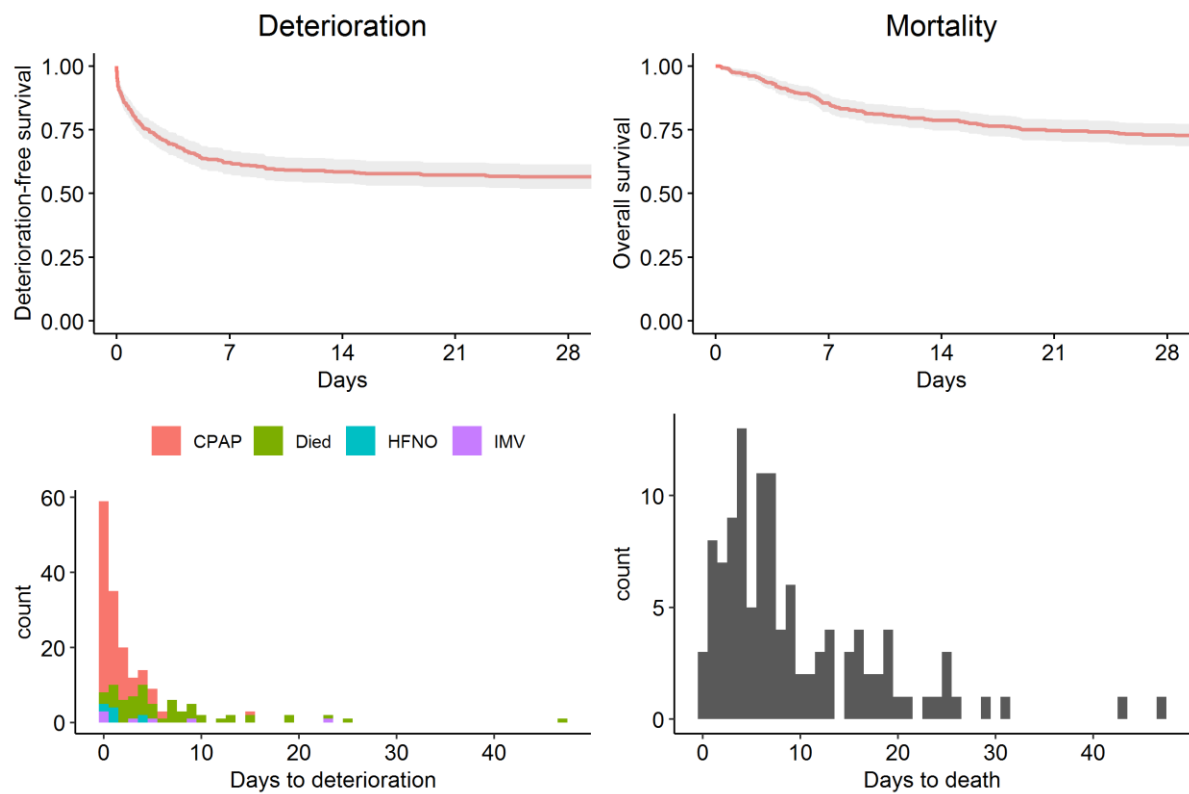

**Supplementary Figure 4: Missingness of candidate prognostic models.**

Shown as column-wise percentage missing, stratified by (a) composite outcome of clinical deterioration; and (b) mortality during hospital admission.

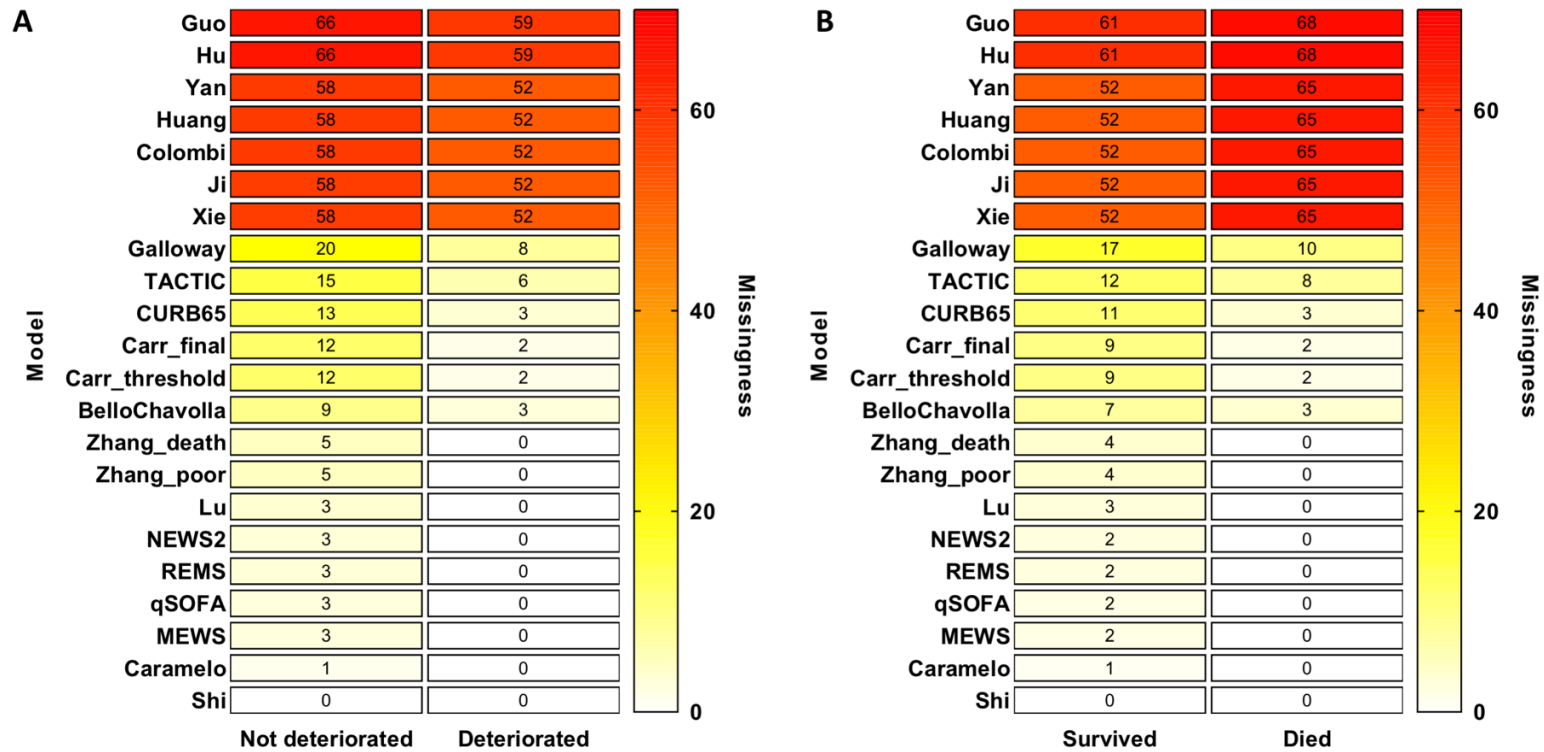

***Supplementary Figure 5: Plots showing risk scores vs observed prevalence of outcomes for points-based prognostic scores.***

The primary outcome of interest for each model is shown in the plot sub-heading. Individual predictions for each prognostic model were averaged across imputations for each participant in the dataset in order to generate these pooled plots.

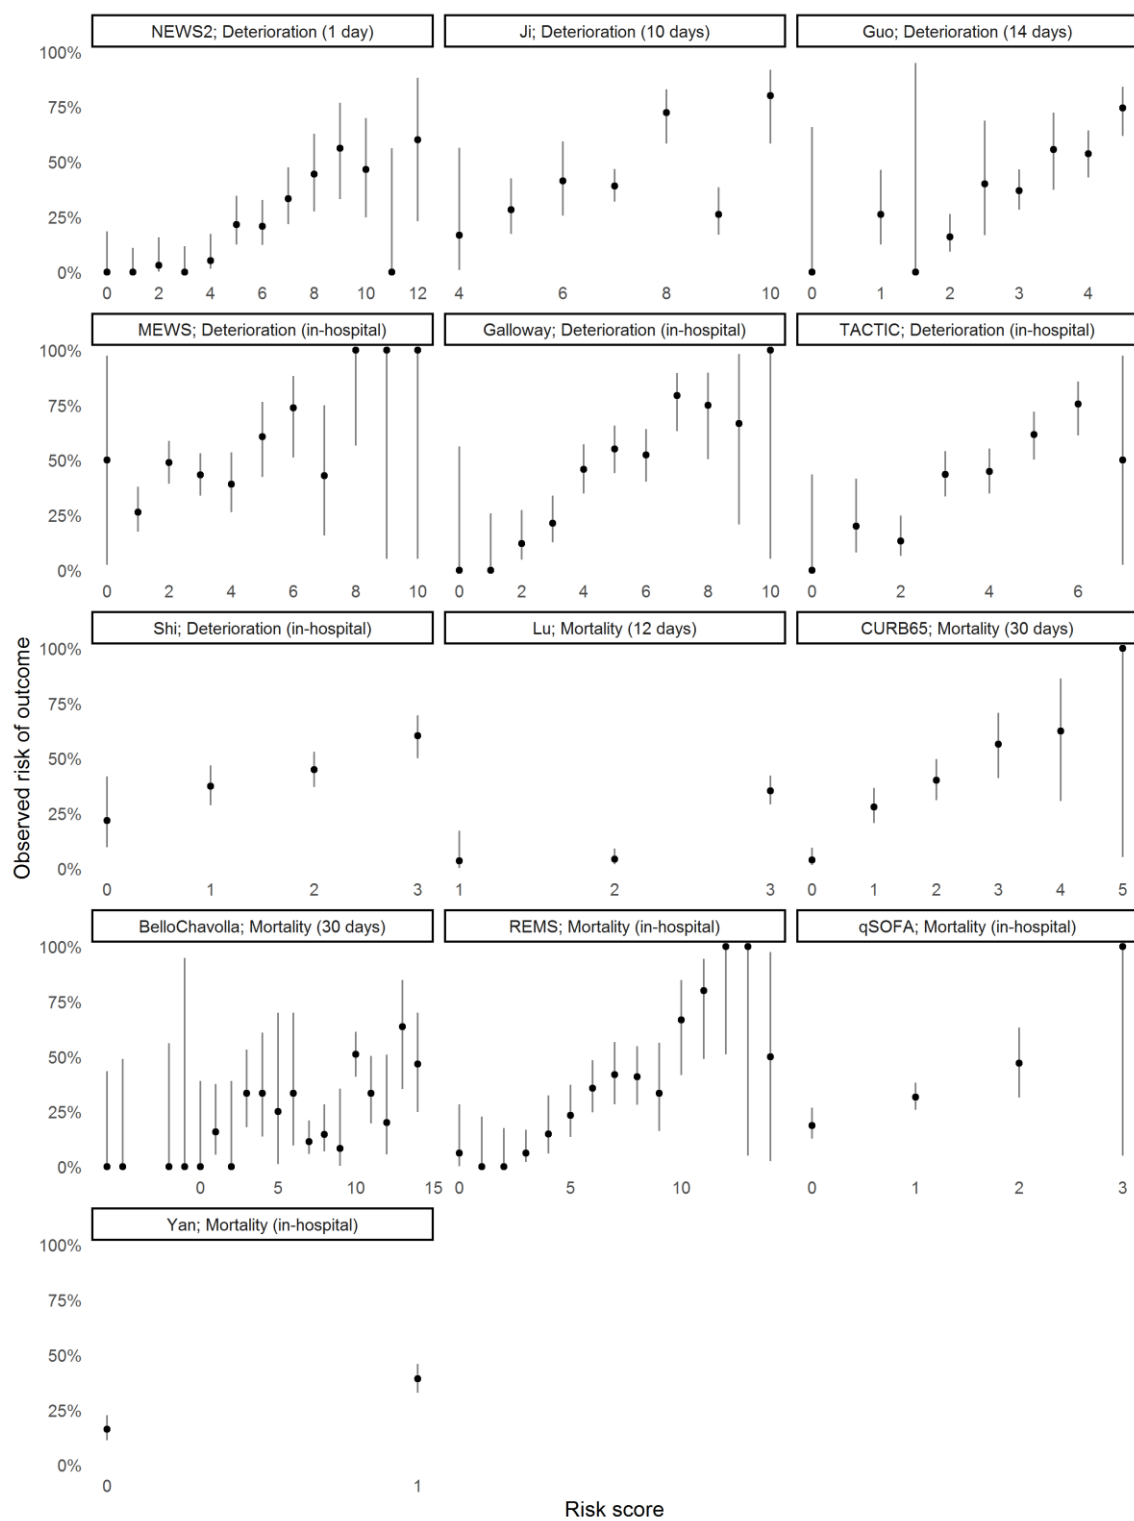

***Supplementary Figure 6: Heat map showing time-dependent receiver operating characteristic areas under the curve for each prognostic score to predict (a) deterioration or (b) mortality,***

For each model, discrimination is stratified by interval from hospital admission to the outcome event. The original intended primary outcome for the model is shown in brackets in the y-axis labels. AUROC = area under the receiver operating characteristic curve.

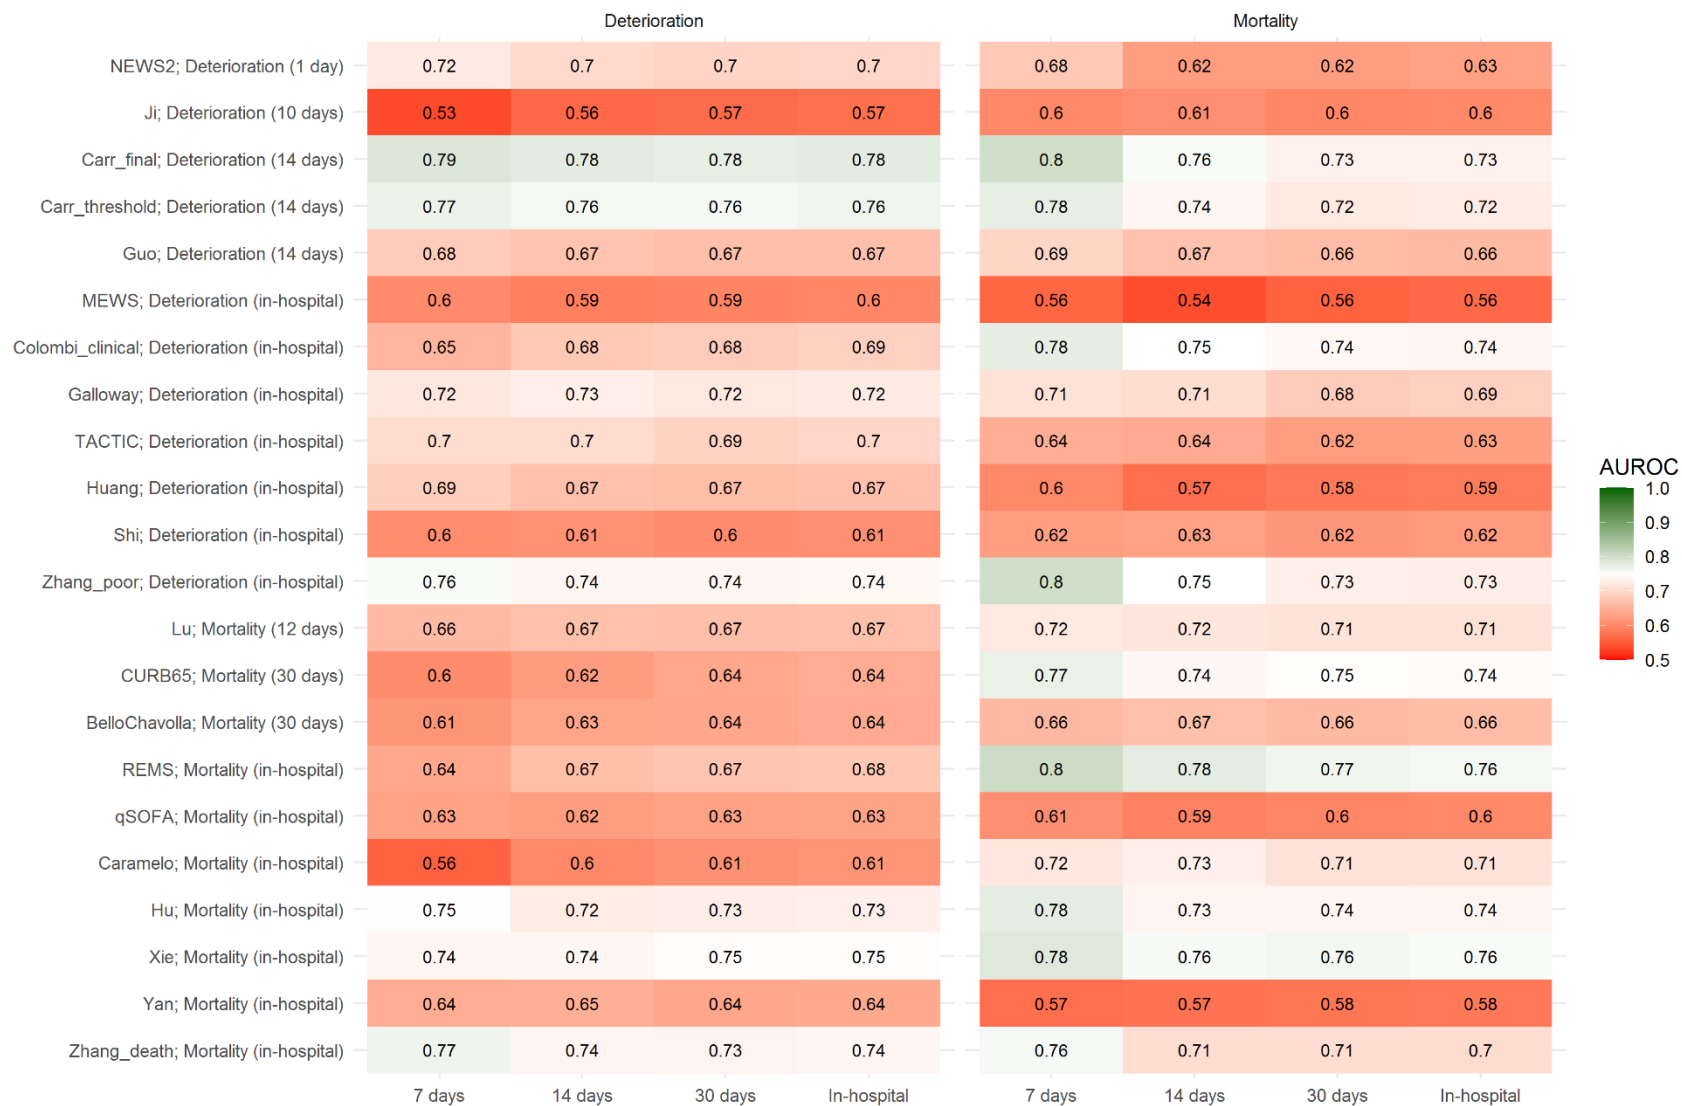

***Supplementary Figure 7: Heat map showing time-dependent receiver operating characteristic areas under the curve for a priori clinical predictors of interest in univariable analyses to predict (a) clinical deterioration or (b) mortality***

For each predictor, discrimination is stratified by interval from hospital admission to the outcome event. AUROC = area under the receiver operating characteristic curve.

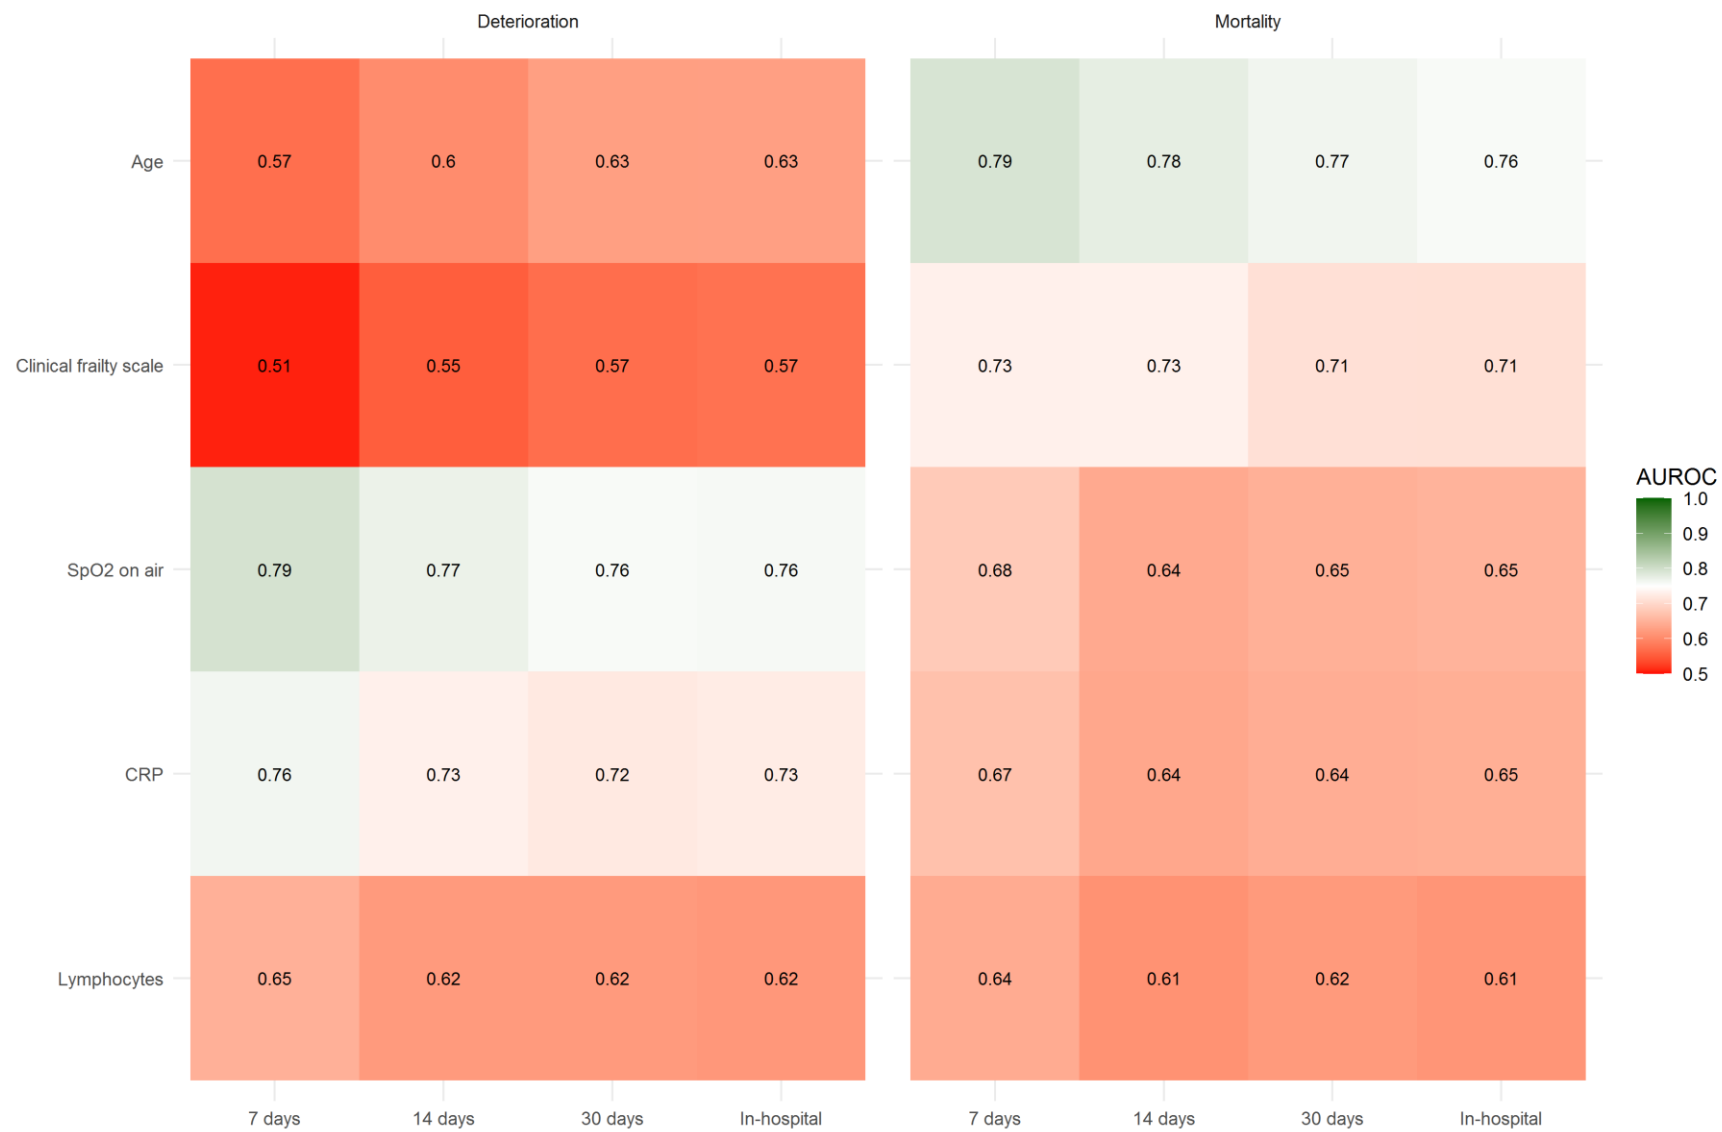



***Supplementary Figure 8: Decision curve analysis comparing net benefit of each candidate model for (A) clinical deterioration; and (B) mortality.***

For each analysis, the endpoint is the original intended endpoint for the index model (purple line; endpoint shown in plot subheading). Comparisons are made to the strategies of treating all patients (red); treating no patients (blue); and offering treatment based on the most discriminating univariable predictor (green; admission oxygen saturation on room air for deterioration models (A); patient age for mortality models (B)). Each candidate model and univariable predictor was recalibrated to the validation data during analysis to enable fair, head-to-head comparisons. All curves are shown with Loess-smoothing.

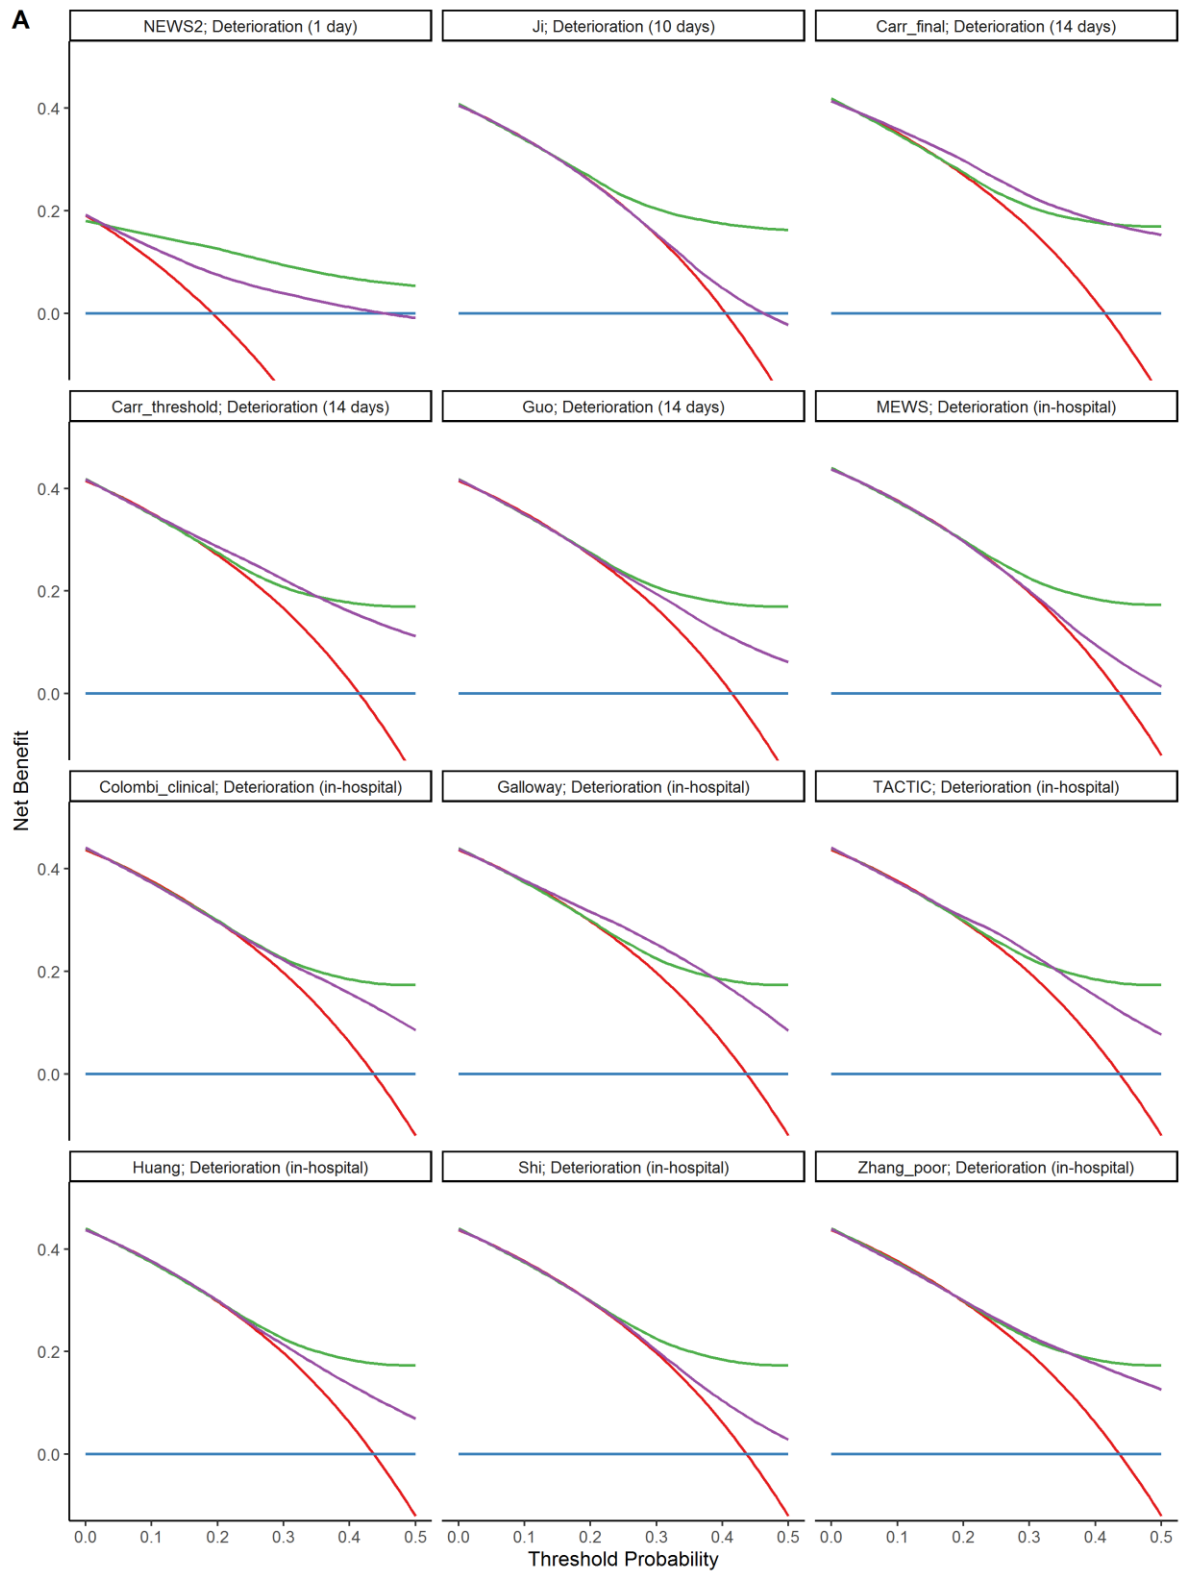

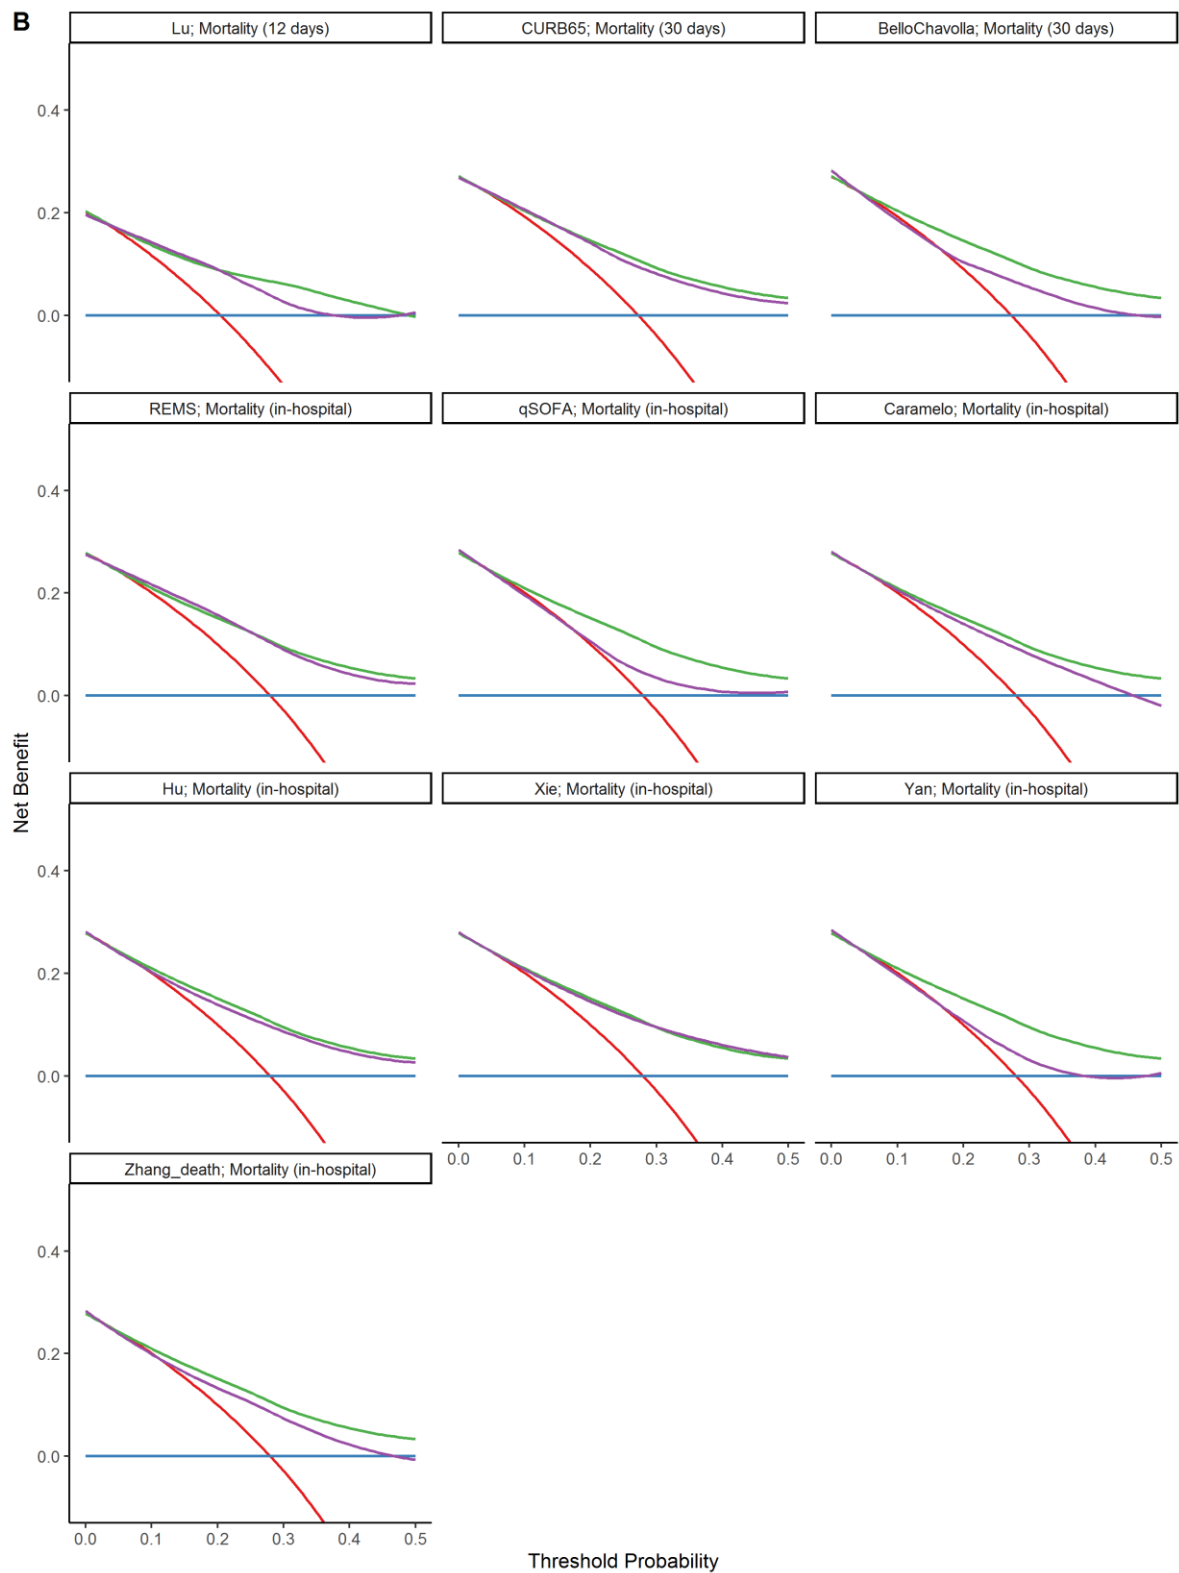

**Supplementary Figure 9: Restricted cubic splines plots showing associations between most discriminating univariable predictors of clinical deterioration and mortality and log odds of outcome, respectively.**

Age was the most discriminating univariable predictor of in-hospital mortality, while oxygen saturation (SpO<sub>2</sub>) on air was the most discriminating predictor of in-hospital clinical deterioration. For both univariable predictors, associations appear approximately linear on the log odds scale.

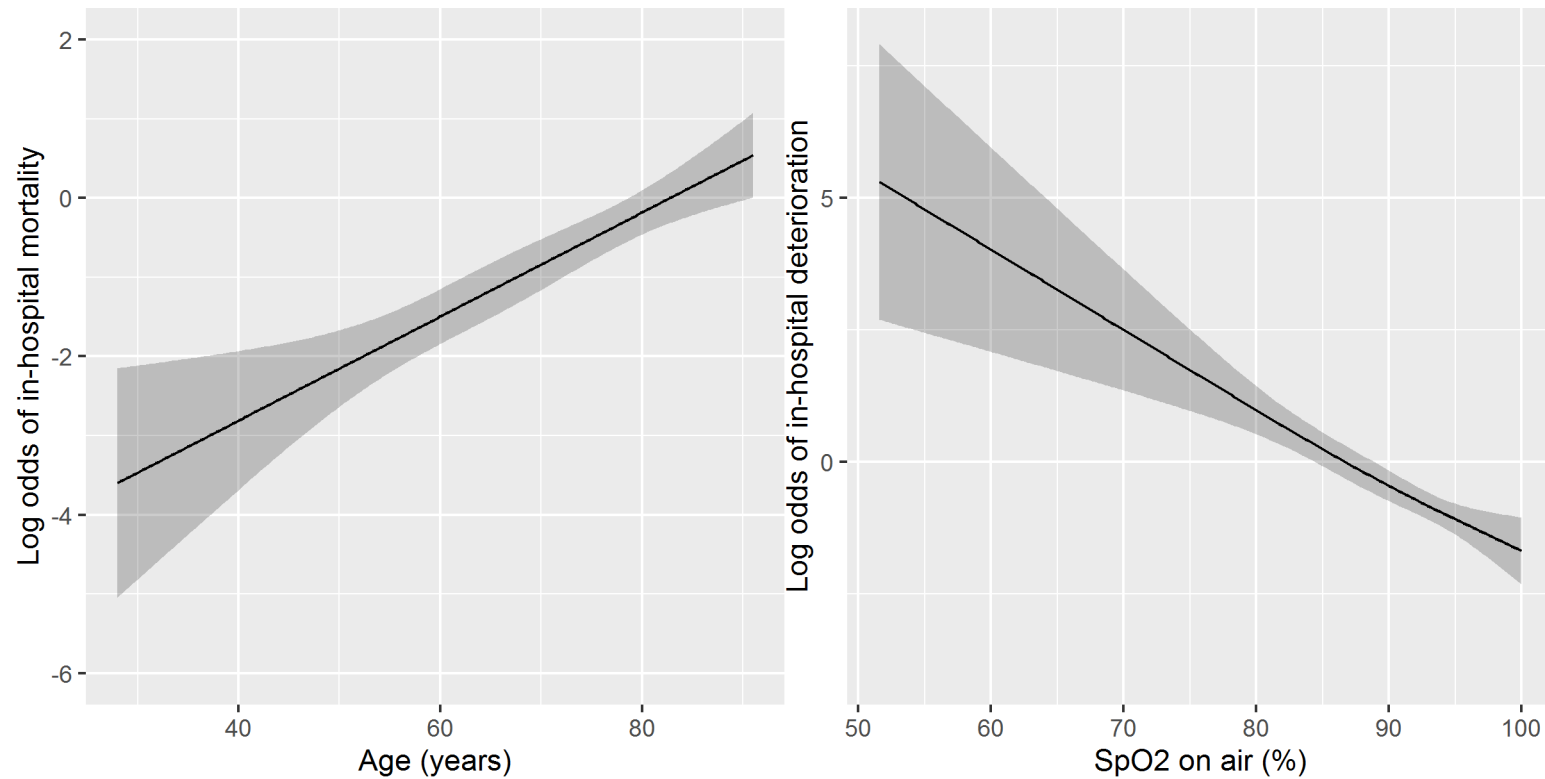

## References

1. Wynants L, Calster B Van, Collins GS, Riley RD, Heinze G, Schuit E, Bonten MMJ, Damen JAA, Debray TPA, Vos M De, Dhiman P, Haller MC, Harhay MO, Henckaerts L, Kreuzberger N, Lohmann A, Luijken K, Ma J, Navarro CLA, Reitsma JB, Sergeant JC, Shi C, Skoetz N, Smits LJM, Snell KIE, Sperrin M, Spijker R, Steyerberg EW, Takada T, Kuijk SMJ van, et al. Prediction models for diagnosis and prognosis of covid-19: systematic review and critical appraisal. *BMJ British Medical Journal Publishing Group*; 2020; 369.
2. Bai X, Fang C, Zhou Y, Bai S, Liu Z, Chen Q, Xu Y, Xia T, Gong S, Xie X, Song D, Du R, Zhou C, Chen C, Nie D, Tu D, Zhang C, Liu X, Qin L, Chen W. Predicting COVID-19 malignant progression with AI techniques. *medRxiv Cold Spring Harbor Laboratory Press*; 2020; : 2020.03.20.20037325.
3. Barda N, Riesel D, Akriv A, Levi J, Finkel U, Yona G, Greenfeld D, Sheiba S, Somer J, Bachmat E, Rothblum GN, Shalit U, Netzer D, Balicer R, Dagan N. Performing risk stratification for COVID-19 when individual level data is not available, the experience of a large healthcare organization. *medRxiv Cold Spring Harbor Laboratory Press*; 2020; : 2020.04.23.20076976.
4. Chassagnon G, Vakalopoulou M, Battistella E, Christodoulidis S, Hoang-Thi T-N, Dangeard S, Deutsch E, Andre F, Guillo E, Halm N, Hajj S El, Bompard F, Neveu S, Hani C, Saab I, Campredon A, Koulakian H, Bennani S, Freche G, Barat M, Lombard A, Fournier L, Monnier H, Grand T, Gregory J, Nguyen Y, Khalil A, Mahdjoub E, Brillet P-Y, Ba ST, et al. Holistic AI-Driven Quantification, Staging and Prognosis of COVID-19 Pneumonia. *medRxiv Cold Spring Harbor Laboratory Press*; 2020; : 2020.04.17.20069187.
5. DAS A, Mishra S, Gopalan SS. Predicting community mortality risk due to CoVID-19 using machine learning and development of a prediction tool. *medRxiv Cold Spring Harbor Laboratory Press*; 2020; : 2020.04.27.20081794.
6. Gong J, Ou J, Qiu X, Jie Y, Chen Y, Yuan L, Cao J, Tan M, Xu W, Zheng F, Shi Y, Hu B. A Tool for Early Prediction of Severe Coronavirus Disease 2019 (COVID-19): A Multicenter Study Using the Risk Nomogram in Wuhan and Guangdong, China. *Clin. Infect. Dis. Oxford University Press*; 2020; 71: 833–840.
7. Jiang X, Coffee M, Bari A, Wang J, Jiang X, Huang J, Shi J, Dai J, Cai J, Zhang T, Wu Z, He G, Huang Y. Towards an Artificial Intelligence Framework for Data-Driven Prediction of Coronavirus Clinical Severity. *Comput. Mater. Contin.* 2020; 62: 537–551.
8. Levy TJ, Richardson S, Coppa K, Barnaby DP, McGinn T, Becker LB, Davidson KW, Cohen SL, Hirsch JS, Zanos T, Consortium N & MC-19 R. Development and Validation of a Survival Calculator for Hospitalized Patients with COVID-19. *medRxiv Cold Spring Harbor Laboratory Press*; 2020; : 2020.04.22.20075416.
9. Liang W, Liang H, Ou L, Chen B, Chen A, Li C, Li Y, Guan W, Sang L, Lu J, Xu Y, Chen G, Guo H, Guo J, Chen Z, Zhao Y, Li S, Zhang N, Zhong N, He J, COVID-19 for the CMTEG for. Development and Validation of a Clinical Risk Score to Predict the Occurrence of Critical Illness in Hospitalized Patients With COVID-19. *JAMA Intern. Med. American Medical Association*; 2020; 180: 1081.
10. Liu Q, Fang X, Tokuno S, Chung U, Chen X, Dai X, Liu X, Xu F, Wang B, Peng P. Prediction of the clinical outcome of COVID-19 patients using T lymphocyte subsets with 340 cases from Wuhan, China: a retrospective cohort study and a web visualization tool. *medRxiv Cold Spring Harbor Laboratory Press*; 2020; : 2020.04.06.20056127.
11. McRae MP, Simmons GW, Christodoulides NJ, Lu Z, Kang SK, Fenyo D, Alcorn T, Dapkins IP, Sharif I, Vurmaz D, Modak SS, Srinivasan K, Warhadpande S, Shrivastav R, McDevitt JT. Clinical Decision Support Tool and Rapid Point-of-Care Platform for Determining Disease Severity in Patients with COVID-19. *medRxiv Cold Spring Harbor Laboratory Press*; 2020; : 2020.04.16.20068411.
12. Pourhomayoun M, Shakibi M. Predicting Mortality Risk in Patients with COVID-19 Using Artificial Intelligence to Help Medical Decision-Making. *medRxiv Cold Spring Harbor Laboratory Press*; 2020; : 2020.03.30.20047308.
13. Qi X, Jiang Z, YU Q, Shao C, Zhang H, Yue H, Ma B, Wang Y, Liu C, Meng X, Huang S, Wang J, Xu D, Lei J, Xie G, Huang H, Yang J, Ji J, Pan H, Zou S, Ju S. Machine learning-based CT radiomics model for predicting hospital stay in patients with pneumonia associated with SARS-CoV-2 infection: A multicenter study. *medRxiv Cold Spring Harbor Laboratory Press*; 2020; : 2020.02.29.20029603.
14. Sarkar J, Chakrabarti P. A Machine Learning Model Reveals Older Age and Delayed Hospitalization as Predictors of Mortality in Patients with COVID-19. *medRxiv Cold Spring Harbor Laboratory Press*; 2020; : 2020.03.25.20043331.
15. Singh K, Valley TS, Tang S, Li BY, Kamran F, Sjoding MW, Wiens J, Otles E, Donnelly JP, Wei MY, McBride JP, Cao J, Penzoza C, Ayanian JZ, Nallamothu BK. Evaluating a Widely Implemented Proprietary

- Deterioration Index Model Among Hospitalized COVID-19 Patients. *medRxiv* Cold Spring Harbor Laboratory Press; 2020; : 2020.04.24.20079012.
16. Vaid A, Somani S, Russak AJ, Freitas JK De, Chaudhry FF, Paranjpe I, Johnson KW, Lee SJ, Miotto R, Zhao S, Beckmann N, Naik N, Arfer K, Kia A, Timsina P, Lala A, Paranjpe M, Glowe P, Golden E, Danieleto M, Singh M, Meyer D, O'Reilly PF, Huckins LH, Kovatch P, Finkelstein J, Freeman RM, Argulian E, Kasarskis A, Percha B, et al. Machine Learning to Predict Mortality and Critical Events in COVID-19 Positive New York City Patients. *medRxiv* Cold Spring Harbor Laboratory Press; 2020; : 2020.04.26.20073411.
  17. Guillet CV, Guillet RV, Kramer AA, Maurer PM, Menke GA, Hill CL, Knaus WA. TOWARD A COVID-19 SCORE-RISK ASSESSMENTS AND REGISTRY. *medRxiv* Cold Spring Harbor Laboratory Press; 2020; : 2020.04.15.20066860.
  18. Yuan M, Yin W, Tao Z, Tan W, Hu Y. Association of radiologic findings with mortality of patients infected with 2019 novel coronavirus in Wuhan, China. Schildgen O, editor. *PLoS One* Public Library of Science; 2020; 15: e0230548.
  19. Zeng L, Li J, Liao M, Hua R, Huang P, Zhang M, Zhang Y, Shi Q, Xia Z, Ning X, Liu D, Mo J, Zhou Z, Li Z, Fu Y, Liao Y, Yuan J, Wang L, He Q, Liu L, Qiao K. Risk assessment of progression to severe conditions for patients with COVID-19 pneumonia: a single-center retrospective study. *medRxiv* Cold Spring Harbor Laboratory Press; 2020; : 2020.03.25.20043166.
